# Supplementary material for: Single cell lineage analysis of mouse embryonic stem cells at the exit from pluripotency
Source: PubMed Central journal article supplement (PMC3798188; doi:10.1242/bio.20135934), 2013-08-19
Supplement: supp_bio.20135934_bio.20135934-s1.pdf [file supp_bio.20135934_bio.20135934-s1.pdf]

## Supplementary Material

Jamie Trott and Alfonso Martinez Arias doi: 10.1242/bio.20135934

**Table S1. Primer sequences used for analysis of gene expression by qPCR.** All amplicons were within 1 kb of the 3' end of the corresponding transcript to ensure amplicons were amplified representatively during the initial PCR amplification step. Primers were designed using the primer3 web tool (<http://primer3.ut.ee>).

| Gene          | Primer    | Sequence                  |
|---------------|-----------|---------------------------|
| <i>Axin2</i>  | 5'-primer | ACACATGCAGAAATGGGTCA      |
|               | 3'-primer | ACGTACGGTGTAGCCTTTGG      |
| <i>T/Bra</i>  | 5'-primer | CTGGGAGCTCAGTTCTTTTCG     |
|               | 3'-primer | GTCCACGAGGCTATGAGGAG      |
| <i>Eomes</i>  | 5'-primer | GGCTGAGCCTGAGAGTCAAG      |
|               | 3'-primer | AGAGCCAGCCCTACAACAAA      |
| <i>Fgf5</i>   | 5'-primer | GCTCAATGATCAGAAGGAGGA     |
|               | 3'-primer | TCAGCTGGTCTTGAATGAGG      |
| <i>Gapdh</i>  | 5'-primer | AACTTTGGCATTGTGGAAGG      |
|               | 3'-primer | GGATGCAGGGATGATGTTCT      |
| <i>Gata4</i>  | 5'-primer | CCTAAACCTTACTGGCCGTAGC    |
|               | 3'-primer | ACAATGTTAACGGGTTGTGGAG    |
| <i>Gata6</i>  | 5'-primer | TGGGAGCCATTGGTCTATC       |
|               | 3'-primer | GACCTCAGATCAGCCACGTT      |
| <i>Mixl1</i>  | 5'-primer | CAAGCACGCTCACAGTCAAT      |
|               | 3'-primer | GGAAGCTGTTTCTGAGCTG       |
| <i>Nanog</i>  | 5'-primer | TACCTCAGCCTCCAGCAGAT      |
|               | 3'-primer | GCAATGGATGCTGGGATACT      |
| <i>Oct4</i>   | 5'-primer | CCAATCAGCTTGGGCTAGAG      |
|               | 3'-primer | CTGGGAAAGGTGTCCCTGTA      |
| <i>Otx2</i>   | 5'-primer | CTGGGCTGAACATTCCAGTT      |
|               | 3'-primer | GTCCATTTCAAGTTGCTGGT      |
| <i>Ppia</i>   | 5'-primer | TTACCCATCAAACCATTCCCTTCTG |
|               | 3'-primer | AACCCAAAGAACTTCAGTGAGAGC  |
| <i>Rex1</i>   | 5'-primer | GCGGTGTGTACTGTGGTGTG      |
|               | 3'-primer | GACAAGCATGTGCTTCCTCA      |
| <i>Sox1</i>   | 5'-primer | AGACAGCGTGCCTTTGATTT      |
|               | 3'-primer | TGGGATAAGACCTGGGTGAG      |
| <i>Sox2</i>   | 5'-primer | CATGAGAGCAAGTACTGGCAAG    |
|               | 3'-primer | CCAACGATATCAACCTGCATGG    |
| <i>Tcf15</i>  | 5'-primer | TGGACAGAGGAGAAGATTCCA     |
|               | 3'-primer | TAGGCCTGGATGGCTAGATG      |
| <i>Tcf3</i>   | 5'-primer | ACGGTTCTGGATGAGACAGG      |
|               | 3'-primer | AAGCAGGGAGCTGTTTCAGTG     |
| <i>Zfp521</i> | 5'-primer | CCTGGACTGATGGATGTGTG      |
|               | 3'-primer | CGCCAAGATGTAACAAGCAA      |
